# Supplementary material
Source: PubMed Central journal article supplement (PMC2169281)
Supplement: rspb20070316s05.pdf [file rspb20070316s05.pdf]

## 1 **Statistical methods for multivariate analyses**

2 All statistical analyses were conducted using GenStat 5 (Lawes Agricultural Trust,  
3 Harpenden, UK). Several analyses required the use of multivariate statistics, for which  
4 Generalised Linear Mixed Models (GLMMs) were employed. These are similar to  
5 Generalised Linear Models (GLMs) except they allow both fixed terms and random terms to  
6 be defined. Random terms allow the analysis to take account of repeated measures (Crawley  
7 2002). We included both group and individual as random terms in both GLMMs, to control  
8 for repeated measures at these levels. Model selection was conducted using reverse stepwise  
9 elimination of fixed effects (as per Crawley 2002); all terms were initially entered into the  
10 model and then sequentially dropped until only terms whose elimination would have  
11 significantly reduced the explanatory power of the model remained (thus yielding the ‘final  
12 model’). All two-way interactions were tested, but only those that were significant are  
13 reported. The significance of a fixed effect was determined by dropping it from the final  
14 model (if it was part of the final model), or adding it to the final model and then dropping it (if  
15 it was not part of the final model). We present model tables for both our GLMMs below.

16

1 **Table 1 – Factors affecting the proportion of time a male spent prospecting.**

2 A full description of the model and its terms is presented in the methods section of the paper.  
 3 Briefly, the results are from a GLMM with binomial error structure, with days spent  
 4 prospecting during the month set as the response term and total number of days in the month  
 5 as the binomial total. The analysis used a sample of 2860 male-months, for 153 subordinate  
 6 natal males, 51 subordinate immigrant males and 24 dominant immigrant males from our  
 7 eight best-studied groups. Repeated measures of individuals and groups were controlled by  
 8 fitting both as random factors.

| <b>Full Model</b>                                                          | $\chi^2$                  | d.f.        | <i>P</i> |
|----------------------------------------------------------------------------|---------------------------|-------------|----------|
| Age mid-month                                                              | 331.67                    | 1           | <0.001   |
| Mean Monthly Female Fertility                                              | 227.94                    | 1           | <0.001   |
| Dominance and Dispersal Class<br>(Dom Immigrant, Sub Immigrant, Sub Natal) | 198.42                    | 2           | <0.001   |
| Mean Monthly Temperature                                                   | 34.86                     | 1           | <0.001   |
| Mean Monthly Rainfall                                                      | 7.59                      | 1           | 0.006    |
| Mean Monthly Body Weight <sup>1</sup>                                      | 3.21                      | 1           | 0.073    |
| <b>Final model</b>                                                         | <b>Effect</b>             | <b>S.E.</b> |          |
| Constant                                                                   | -1.64                     | 0.17        |          |
| Age mid-month                                                              | 0.0030                    | 0.00017     |          |
| Dominance and Dispersal Class<br>(Dom Immigrant, Sub Immigrant, Sub Natal) | Figure 1a<br>in the paper |             |          |
| Mean Monthly Female Fertility                                              | 3.09                      | 0.20        |          |
| Mean Monthly Temperature                                                   | -0.036                    | 0.0061      |          |
| Mean Monthly Rainfall                                                      | -0.0034                   | 0.0012      |          |

9

10 <sup>1</sup>Residuals of body weight on age.

11

1 **Table 2 – Do subordinate immigrant males and subordinate natal males differ in their**  
 2 **likelihood of siring intra- and extra-group young?**

3 A full description of the model and its terms is presented in the methods section of the paper.  
 4 Briefly, the results are from a GLMM with binomial error structure, with whether or not (1 or  
 5 0) the male sired any offspring via the reproductive route in question (intra- or extra-group)  
 6 during his tenure in the dispersal class in question (natal or immigrant) set as the response  
 7 term, and the binomial total set to 1. The analysis used a sample of 162 tenures (123 natal, 39  
 8 immigrant) for 141 different males in our eight best-studied groups. Each tenure contributed  
 9 two data points (one for intra-group and one for extra-group reproduction). Repeated  
 10 measures of individuals and groups were controlled by fitting both as random factors.

| <b>Full Model</b>                                                | $\chi^2$                  | d.f.        | <i>P</i> |
|------------------------------------------------------------------|---------------------------|-------------|----------|
| Time monitored in that dispersal class (days)                    | 22.15                     | 1           | <0.001   |
| Dispersal class * Route to reproduction                          | 6.47                      | 1           | 0.011    |
| Subordinate male dispersal class (natal, immigrant) <sup>1</sup> | 8.66                      | 1           | 0.003    |
| Route to reproduction (intra-group, extra-group) <sup>2</sup>    | 8.35                      | 1           | 0.004    |
| Average age of male while monitored                              | 0.63                      | 1           | 0.63     |
| <b>Final model</b>                                               | <b>Effect</b>             | <b>S.E.</b> |          |
| Constant                                                         | -1.05                     | 0.53        |          |
| Time monitored in that dispersal class (days)                    | 0.0040                    | 0.00084     |          |
| Dispersal class * Route to reproduction                          | Figure 2b<br>in the paper |             |          |

11  
 12 <sup>1,2</sup>The statistical significances of these two terms were calculated after removing the  
 13 significant interaction between them from the model. <sup>1</sup> conveys that, on average, subordinate  
 14 immigrant males were significantly more likely to sire offspring than subordinate natal males.  
 15 <sup>2</sup> conveys that, on average, subordinate males were more likely to sire extra-group offspring  
 16 than within-group offspring. Effect sizes for these individual terms are not reported because  
 17 the effects for the interaction between them are presented in Figure 2b in the paper.

18

## 1 **Genetic sampling, extraction and analysis**

2 Tissue samples were collected by removing a small piece of tail-tip skin from pups on  
3 emergence from the breeding burrow (at approximately three weeks of age) or from captured  
4 adults (see Young et al. 2005 for capture methods). Samples were stored in DMSO or 100mM  
5 EDTA 95% EtOH at -20°C. DNA was extracted using standard chelex or phenol/chloroform  
6 methods (Maniatis et al. 1982) and samples were stored in ddH<sub>2</sub>O at -20°C.

7

8 Fifteen floro-labelled microsatellite markers with 11±4 (mean±SD) alleles were used to assess  
9 paternity (AHT130, Fca045, Fca077, Fca232, Hg8.10, M54, Ssu7.1, Ssu8.5, Ssu10.4,  
10 Ssu11.12, Ssu12.1, Ssu13.8, Ssu13.9, Ssu14.14, Ssu14.18; see Table 3). To enable  
11 multiplexing we changed the annealing sites of markers Ssu7.1, Ssu8.5, Ssu11.12, Ssu12.1,  
12 and Ssu13.8 (Table 3). Touchdown 10µl PCR multiplexes contained three to four markers,  
13 labeled with fluorescent dyes HEX<sup>TM</sup>, TET<sup>TM</sup> and FAM<sup>TM</sup> (PE Applied Biosystems®). All  
14 PCR reactions contained 1.5µl Applied Biosystems® Gold Buffer<sup>TM</sup>, 0.8µl 25mM MgCl<sub>2</sub>, 1µl  
15 10mM dNTP mix, 0.2µl Taq Gold<sup>TM</sup>. The amount of marker varied between markers and  
16 multiplexes (from 0.25 to 0.8µl 10mM marker, equivalent to 2.5-8 pmol) and the annealing  
17 temperature ranged from 48 to 58°C. Typical cycling conditions were 12min at 95°C, 20 x  
18 (30s@95°C, 30s@58°C (-0.1°C/cycle), 1min@72°C), 15 x (30s@95°C, 30s@56°C,  
19 1min@72°C), 10min@72°C. PCR products were run on a PE Applied Biosystems® ABI  
20 377XL<sup>TM</sup> using TAMRA<sup>TM</sup> 500 as internal size standard and cellulose combs to prevent  
21 spillover. Results were extracted and analyzed with Genotyper<sup>TM</sup> software. Extracted lanes  
22 were compared to the raw gel image to eliminate false dye peaks.

23

1 **Table 3 - Microsatellite statistics**

2 The annealing sites of markers Ssy7.1, Ssu8.5, Ssu11.12, Ssu12.1 and Ssu13.8 were redesigned to allow multiplexing (changes within brackets).  
 3 After Bonferroni correction, only one marker deviated significantly from Hardy-Weinberg equilibrium, possibly because its low variation (only  
 4 three alleles) made it susceptible to random effects.

5

| Marker                    | Ref | Sequences 5'-3'<br>Forward/Reverse                 | # ind          | # alleles   | Size range | H <sub>OBS</sub> | H <sub>EXP</sub> | p          |
|---------------------------|-----|----------------------------------------------------|----------------|-------------|------------|------------------|------------------|------------|
| <b>AHT130</b>             | 1   | CCTCTCCTGGTAAGTGCTGC<br>TGAACACTGGTCCCCAG          | 639            | 17          | 122-156    | 0.77             | 0.73             | 0.44       |
| <b>Fca 045</b>            | 2   | TGAAGAAAAGAATCAGGCTGTG<br>GTATGAGCATCTCTGTGTTCTGTG | 270            | 11          | 158-178    | 0.80             | 0.64             | 0.08       |
| <b>Fca 077</b>            | 2   | GGCACCTATAACTACCAGTGTGA<br>ATCTCTGGGGAAATAAATTTTGG | 677            | 10          | 96-114     | 0.61             | 0.59             | 0.47       |
| <b>Fca 232</b>            | 2   | ATGACCATCTCAAACITTCATGG<br>AGCTGAGTTTGCGTTTATCATG  | 714            | 12          | 90-118     | 0.62             | 0.64             | 0.36       |
| <b>HG 8.10</b>            | 3   | AATTCTGAAGCAGCCCAAG<br>GAATTCTTTCTAGCATAGGTTG      | 263            | 5           | 190-225    | 0.37             | 0.39             | 0.43       |
| <b>M54</b>                |     | CAACATGGAGCCTCCTTGGG<br>TCTAAACCAGACTAGAAAAGTG     | 560            | 10          | 120-128    | 0.74             | 0.63             | 0.22       |
| <b>*Ssu 7.1 (+18 bp)</b>  | 4   | ATCCCTTAATGCATAGGCACAC<br>CCTGCTAGTCTTCTCCGTGCG    | 676            | 11          | 158-178    | 0.77             | 0.63             | 0.14       |
| <b>*Ssu 8.5 (+44 bp)</b>  | 4   | GTCAGGTGCTTAAGTACTGG<br>TGGAGTCACTCATTGGTTTTG      | 492            | 17          | 252-284    | 0.86             | 0.74             | 0.04       |
| <b>Ssu 10.4</b>           | 4   | CTCCAGTTCTTTCCCTGGAG<br>CATTGGGTGCACACTGTCTCC      | 674            | 17          | 108-140    | 0.79             | 0.73             | 0.35       |
| <b>*Ssu11.12 (-11 bp)</b> | 4   | CAGGAAATTTTCATCTGGTGTAG<br>AGCTTTATTTTCTCTGTGGCA   | 689            | 14          | 102-128    | 0.75             | 0.69             | 0.40       |
| <b>*Ssu 12.1 (+26 bp)</b> | 4   | TTGTTTAAGCCACCCAGTCTG<br>TCCTGGTGACACAAACAATGC     | 674            | 13          | 158-182    | 0.78             | 0.67             | 0.17       |
| <b>*Ss 13.8 (+69 bp)</b>  | 4   | GATCAGTGAGAACAGAAGTGC<br>ACCTCCTCCTCAGATGCATC      | 407            | 11          | 204-228    | 0.68             | 0.64             | 0.48       |
| <b>Ss 13.9</b>            | 4   | TGGAAGTAGGTAGAAGACATTT<br>AGGGATGAGAAGACCACCTC     | 200            | 3           | 130-134    | 0.66             | 0.25             | 0.00       |
| <b>Ss 14.14</b>           | 4   | GCATTAACATAAATTTGCTGAG<br>CCCGAGGACAGAGACAAAATG    | 219            | 9           | 111-127    | 0.80             | 0.62             | 0.02       |
| <b>Ssu 14.18</b>          | 4   | GATCACCTAAAATTGCACTACT<br>TCAACCTGCAGTTTCAGACC     | 192            | 8           | 129-149    | 0.64             | 0.57             | 0.41       |
| <b>Average±SD</b>         |     |                                                    | <b>490±208</b> | <b>11±4</b> | <b>N/A</b> | <b>0.71±0.12</b> | <b>0.61±0.13</b> | <b>N/A</b> |

References 1) (Holmes et al. 1995); 2) (Menotti-Raymond et al. 1999); 3) (Goodman 1997); 4) (Griffin et al. 2001). \*modified annealing sites.

6

1 Individual genotypes were compared to those of their relatives (where know from life-history  
2 data) in an attempt to isolate genotyping errors. Since mother and siblings can reliably be  
3 assigned from observational data (Griffin et al. 2003), it was possible to rectify some of the  
4 identified genotyping errors by using simple logical rules based on Mendelian patterns of  
5 inheritance. In cases of single repeat errors (due to PCR stage misprint or variations in  
6 fragment mobility in gels), inferences from the genotypes of relatives allowed us to directly  
7 correct the genotype. Additionally, dropouts or poor amplification may cause false  
8 homozygotes. Wherever possible, we corrected such errors by looking at the raw gel to see if  
9 peaks just below the threshold had been omitted, or alternatively, from inferences made from  
10 the genotypes of known relatives. However, sometimes no correction could be made  
11 objectively, despite an obvious error, so these were left unaltered. Duplicate runs showed an  
12 overall error rate of about 3%, of which the majority could be corrected. When assigning  
13 paternity (see below) we therefore assumed an overall error rate in the final genotypes of 2%.  
14 The overall amplification success was  $78\% \pm 18\%$ , yielding data for an average of  $9.3 \pm 3.1$  loci  
15 per individual. Of the 673 pups that emerged in our 15 study groups between 1997 and 2002  
16 inclusive, 499 (74.1%) were successfully sampled and genotyped at  $>4$  loci (median 9; range  
17 5-15). Only individuals scored at 5-15 loci were considered in our genetic analyses.

18

### 19 **Cervus simulation parameters for EGP prevalence calculations**

20 The Cervus simulation parameters for each litter were set as follows. Number of candidate  
21 fathers: the number of known candidates fathers for the litter plus four (to be conservative, by  
22 allowing for possible interactions with males from an additional and completely unknown  
23 group containing the modal number of candidates). Number of related candidate fathers: five  
24 males related at 0.25 (estimated from known candidates). Proportion of candidates sampled:  
25 89.5% of known candidate fathers had been genotyped (at 5-15 loci), but, to be conservative,

1 we calculated a lower value (averaging 75.5%) to reflect the possibility of interactions with  
2 four additional unknown (and hence unsampled) males from outside our study population (see  
3 above). Proportion of loci typed: calculated as an average of 70%. Genotyping error rate: set  
4 at 2% (see above for calculation).

5

### 6 **Cervus simulation parameters for subordinate male reproductive rate calculations**

7 The Cervus simulation parameters were set as described for the previous Cervus run (see  
8 above) except that the removal of extra-group dominant males from the candidate files in this  
9 case reduced the number of related candidate males from five to four and the modal number  
10 of candidates from an unknown group (used in the number of candidate males and proportion  
11 unsampled calculations) from four to three.

12

### 13 **References**

- 14 Crawley, M. J. 2002 *Statistical Computing*. Chichester, UK: John Wiley & Sons, Ltd.
- 15 Goodman, S. J. 1997 Dinucleotide repeat polymorphisms at seven anonymous microsatellite  
16 loci cloned from the European Harbour Seal (*Phoca vitulina vitulina*). In *Animal*  
17 *Genetics*, vol. 28, pp. 310-311.
- 18 Griffin, A., Nurnberger, B. & Pemberton, J. M. 2001 A panel of microsatellite markers  
19 developed for meerkats (*Suricata suricatta*) by cross-species amplification and  
20 species-specific cloning. In *Molecular Ecology Notes.*, vol. 1, pp. 83-85.
- 21 Griffin, A. S., Pemberton, J. M., Brotherton, P. N. M., McIlrath, G., Gaynor, D., Kansky, R.,  
22 O'Riain, J. & Clutton-Brock, T. H. 2003 A genetic analysis of breeding success in the  
23 cooperative meerkat (*Suricata suricatta*). *Behav. Ecol.* **14**, 472-480.
- 24 Holmes, N. G., Dickens, H. F., Parker, H. L., Binns, M. M., Mellersh, C. S. & Sampson, J.  
25 1995 18 Canine Microsatellites. In *Animal Genetics*, vol. 26, pp. 132-133.
- 26 Maniatis, T., Fritsch, E. F. & Sambrook, J. 1982 *Molecular Cloning. A Laboratory Manual*.  
27 New York: Cold Spring Harbor Press.

- 1 Menotti-Raymond, M., David, V. A., Lyons, L. A., Schaffer, A. A., Tomlin, J. F., Hutton, M.  
2 K. & O' Brien, S. J. 1999 A genetic linkage map of microsatellites in the domestic cat  
3 (*Felis catus*). In *Genomics*, vol. 57, pp. 9-23.
- 4 Young, A. J., Carlson, A. A. & Clutton-Brock, T. H. 2005 Trade-offs between extra-territorial  
5 prospecting and helping in a cooperative mammal. *Anim. Behav.* **70**, 829-837.
- 6
